# Supplementary material
Source: Atypon-hosted journal article supplement (https://615.library.nashville.org/Record/CARL0000255166/DownloadSupplementalFile?fileId=49)
Supplement: DownloadSupplementalFile [file DownloadSupplementalFile]

## **Churches Ephemera Subject Files 1814-2011 (bulk 1918-1990)**

### **Collection Summary**

**Creator:** Intentionally assembled by Nashville Room staff, beginning at an unknown date, probably in the late 1960s, and collected on an ongoing basis.

**Title:** Churches Ephemera Subject Files

**Inclusive Dates:** 1814-2011 (bulk 1918-1990)

**Summary/Abstract:** Contains a wide variety of materials, mostly from the twentieth century, about Nashville area churches.

**Physical Description/Extent:** 2 cu. ft.

**Language:** In English.

**Stack Location:** Closed stacks workroom

**Repository:** Nashville Room, Nashville Public Library, 615 Church St., Nashville, TN 37219

### **Scope and Contents of the Collection**

Contains a wide variety of materials, mostly from the twentieth century, about Nashville area churches. Includes church histories, biographies of local ministers and other prominent persons in the Christian religious life of Nashville; printed sermons; church bulletins; membership lists; promotional literature; church periodicals and related literature; architectural information on historic church buildings; information about particular churches and their function or activities during wartime; charitable and relief efforts undertaken by local churches; church-related businesses, printing and publishing houses, associations, schools, homes, and similar types of enterprises conducted under church direction; church anniversaries and special events, including Christian holidays such as Easter and Christmas; and a variety of other materials.

Denominations represented in the collection include: Apostolic; Baptist; Catholic; Christian; Church of Christ; Cumberland Presbyterian; Episcopal; Greek Orthodox; Lutheran; Methodist - A.M.E.; Methodist; Nazarene; non-denominational churches; Presbyterian; Unitarian/Universalist; and United Church of Christ. The most numerous materials concern Baptist, Church of Christ, and Methodist churches.

A large quantity of materials from First Presbyterian Church and Downtown Presbyterian Church which span the entire twentieth century are part of this collection, including many of the types of items described above. Particularly noteworthy are printed sermons and church bulletins from Dr. James I. Vance and Dr. Walter R. Courtenay. Documents, letters, brochures and publications detail the nature of the separation of the church in 1955, resulting in the move of First Presbyterian Church to the Oak Hill area south of Nashville, and the renaming of the congregation at the old building to Downtown Presbyterian Church.

## **Organization/Arrangement of Materials**

**Organization:** By denomination.

**Arrangement:** Within each denomination, alphabetical by church name.

## **Restrictions**

**Restrictions on Access:** In library use only. Available by appointment.

**Restrictions on Use and Reproduction:** Some items may be restricted by copyright law or donor restriction.

## **Index Terms**

### **Personal Names:**

Courtenay, Walter Rowe, 1902-

Vance, James I. (James Isaac), 1862-1939

### **Corporate Names/Organizations:**

Bethel A.M.E. Church (Nashville, Tenn.)

Catholic Church. Diocese of Nashville (Tenn.)

Christ Church Episcopal (Nashville, Tenn.)

Downtown Presbyterian Church (Nashville, Tenn.)

First Church of the Nazarene (Nashville, Tenn.)

First Presbyterian Church (Nashville, Tenn.)

Greater Bethel African Methodist Episcopal Church (Nashville, Tenn.)

McKendree Methodist Church (Nashville, Tenn.)

Methodist Church (U.S.). Tennessee Conference

Methodist Publishing House

Monroe Street United Methodist Church (Nashville, Tenn.)

National Baptist Publishing Board

Park Avenue Methodist Church (Nashville, Tenn.)

Southern Baptist Convention. Sunday School Board

Upper Room Chapel (Nashville, Tenn.)

Vine Street Christian Church (Nashville, Tenn.)

West End United Methodist Church (Nashville, Tenn.)

### **Subjects:**

African American churches – Tennessee – Nashville

Baptists -- Tennessee

Catholics -- Tennessee

Christian life – Tennessee – Nashville

Christians -- Tennessee

Christmas – Tennessee – Nashville

Church buildings – Tennessee – Nashville

Church bulletins – Tennessee – Nashville  
Church charities – Tennessee – Nashville  
Church music – Tennessee – Nashville  
Church newsletters – Tennessee – Nashville  
Church work – Tennessee – Nashville  
Churches – Tennessee – Nashville  
Churches of Christ – Tennessee  
City churches – United States  
Clergy – Tennessee – Nashville  
Easter – Tennessee – Nashville  
Episcopalians -- Tennessee  
Holidays – Tennessee – Nashville  
Methodists -- Tennessee  
Nazarenes (Church of the Nazarene) – Tennessee  
Presbyterians -- Tennessee

**Places:**

Nashville (Tenn.) – Buildings, structures, etc.  
Nashville (Tenn.) – Church ~~history~~ **historyes**  
Nashville (Tenn.) – History – Sources  
Nashville (Tenn.) – Religious life and customs  
Nashville (Tenn.) – Social life and customs  
Tennessee – Church history  
Tennessee – Religious life and customs

**Genre/Document Types:**

Church bulletins  
Church records  
Manuscripts (documents)  
Newsletters  
Pamphlets  
Programs (documents)  
Sermons

**Occupations:**

Clergy

**Added Author (Personal Name):**

Courtenay, Walter Rowe, 1902-  
Vance, James I. (James Isaac), 1862-1939

**Added Author (Corporate Heading):**

Catholic Church. ~~\$b~~Diocese of Nashville (Tenn.)  
Downtown Presbyterian Church (Nashville, Tenn.)  
First Presbyterian Church (Nashville, Tenn.)  
McKendree Methodist Church (Nashville, Tenn.)

Methodist Church (U.S.). Tennessee Conference  
Methodist Publishing House  
National Baptist Publishing Board  
Southern Baptist Convention. Sunday School Board

### **Separated Material**

Some items may have been separated for storage to an oversize box, drawer, or the Nashville Room Photographs Collection. Separation notices have been used to indicate such removals.

The following materials were removed from the Churches Ephemera Subject Files and form their own collections, cataloged and accessed separately:

Society of Church Workers of the First Presbyterian Church of Columbia,  
Tennessee minute book, 1897-1914 (bulk 1897-1899)

### **Administrative Information**

**Copyright:** This material may be protected by copyright law (Title 17 U.S. Code)

**Preferred Citation:** [Church name or folder title], Churches Ephemera Subject Files, Ephemera Collections, Nashville Room, Nashville Public Library

**Processing Information:** Weeded by staff members Linda Barnickel and Carol Kaplan, 2003. Rehoused and reprocessed by staff member Linda Barnickel, 2005. All actions part of overall ephemera subject files reprocessing project. Additions processed by Linda Barnickel, 2018.

**Accruals:** Additional accruals are expected.

### **Detailed Description of the Collection**

#### ***CHURCHES:***

In general:

1. 1936-1975

Oversize Box 1, Folder 24: Nashville church directory, 1937-38

2. George Boyles "100 Year Church Project" (lists) compiled 1994

#### ***APOSTOLIC:***

First Apostolic, 2007

#### ***BAPTIST:***

In general, 1943-c.1985  
 Bibliographies, 1993  
 Antioch Missionary, 1908  
 Baker's Grove, 1984  
 Baptist Sunday School Board –  
 1. Dr. James L. Sullivan, 1972-19752. Information Kit, c. 1974-1976  
     Oversize Box 1, Folder 4: Poster: How Your Bible Lessons and  
     Program Materials Are Produced  
 3. 1957-1975  
 Belmont Heights Baptist, 1970-1986  
 Cleveland Street Missionary Baptist, 1987  
     [CD slideshow of photographs]  
 Dalewood, 1955-1994  
 Dickerson Road, 1978  
 Ebenezer Missionary Baptist, 1988  
 Edgefield Baptist, 1992  
 Eighth Street Missionary Baptist, 2007  
 Fairfield, 2008  
 First Baptist - Capitol Hill, 1975-2004  
 First Baptist – Downtown, 1940-1970  
 First Baptist - East Nashville, 1939  
 Hopewell Missionary, 1989  
 Immanuel, 1908-1962  
 Mt. Vernon Missionary, 1997  
 National Baptist Publishing Board  
 Park Avenue, 1988-1989  
 Pleasant Green, 1986  
 St. James, 1988  
 True Faith, 2010

***CATHOLIC:***

In general  
 1. Sesquicentennial of the Diocese, 1987  
 2. Sesquicentennial of the Diocese, calendars, 1987  
 3. Various issues of the Columbian newsletter (Knights of Columbus),  
     1926  
 4. The Columbian, Easter issue, April 1916  
 5. The Cresset newsletter, 1928  
 Cathedral of the Incarnation, 1972-1998  
 Christ the King, 1957, 1981  
 Holy Rosary, 1954, 1955  
 Our Lady of Guadalupe, 2008  
 St. Edward, 1976  
 St. Mary's, 1972

St. Michael, c.1942  
St. Patrick, 1951-1990  
Sisters of Mercy, 1981

***CHRISTIAN:***

Bellevue Christian, c.1980  
First Christian, 2003  
Vine Street Christian  
1. 1923-1983  
2. 1945, 1960

***CHURCH OF CHRIST:***

In general:  
1. Undated  
2. Gospel Advocate, 1939, 1955  
Brentwood Hills, 1988  
Charlotte Avenue, 1990  
Church of Christ Girls' Home, 1977, 1992  
Disciples of Christ Historical Society, ca. 1957-1958  
Donelson Church of Christ, c.1987  
Green Street, 1980  
Hill's Chapel, 1959  
Hillsboro, 1985  
Lindsley Ave., 1993  
Neely's Bend, 1991  
Owen Chapel, c.1970-2009  
Pleasant Hill, c.1980  
Russell Street, undated  
West End Avenue, 1988  
West Nashville Heights, ca. 2007

***CUMBERLAND PRESBYTERIAN:***

In general, undated  
Brookhaven, 1999  
Edgefield, 1963  
Old Beech, 1975-1989

***EPISCOPAL:***

In general, 1993

Christ Church

1. 1954-1958
2. Centennial Celebration, 1929
3. 1829-1972
4. Ordination of Very Rev. B. N. Herlong, Bishop, 1993
5. Order of Service for Consecration...of Rev. Wm. Frederick Gates Jr., 1966
6. 1973-2005

Church of the Advent, 1979-1992

Nashville Laymen's League, 1941

St. Ann's, 1908-1982

St. George's, 2010-2011

***GREEK ORTHODOX:***

Holy Trinity, 1980-2008

***LUTHERAN:***

Concordia, 2007

First Lutheran, 1992

Oversize Box 1, Folder 4:

Pen and ink drawing by Steve Ford, 1988

***METHODIST - A.M.E.***

Bethel/Greater Bethel

1. 1953-1958
2. 1994-2008

St. John, 1963

***METHODIST:***

Methodist (in general),

1. 1929-1983

Oversize Box 1, Folder 4:

United Methodist Urban Ministries newsletter, May 1983

2. "About United Methodism in Nashville" 1954-1980

Belle Meade, 1955, 1970

Bellevue (Bellevue), 1964-2009

Belmont, 1955-1968

Blakemore, 1960-1990

Calvary, 1937-1967  
 Carroll Street, 1952, 1960  
 City Road Chapel, 1965-1990  
 Clark Memorial, c.1992  
 Connell Memorial, c.1990  
 Dalewood, ca. 1953  
 Dodson Chapel, 1965  
 East End, 1934-1995  
 Edgehill, 2005  
 Forest Hills/Waverly Place, 1943-1984  
 Glendale, 1958, 1962  
 Hamilton  
 Hill Memorial, c.1981  
 Hobson, 1951-1962  
 McKendree
 

1. 1933-1998
2. 1959-1965
3. 1929-1951

 Meridian Street, 1931-1950  
 Methodist Laymen's Club, 1962, 1964  
 Methodist Publishing House, 1889-1989  
 Monroe Street
 

1. 1976-2000
2. 1929-1961 (probable Mrs. C.P. Martin donation)
3. 1916-1942

 Park Avenue
 

1. 1948-1953
2. Church records (compilation) 1882-1953

 Pennington, 1957-1962  
 Seay-Hubbard U.M.C., 1985-1990  
 South End, 1988  
 Strothers Meeting House  
 Tennessee Annual Conference
 

1. 1891
2. 1892
3. 1926

 Tulip Street, 1941-1959  
 Upper Room, 1951-1959  
 Walkers, 1987  
 West End
 

1. History & Methodism, 1940, 1961
2. History, 1902-1980
3. History, 1930-1973
4. (mixed materials), 1965
5. Bulletins, 1959-1969
6. Variety of items, 2005



West Nashville, 1988  
Woodbine, 1994

***NAZARENE:***

First Church of the Nazarene

1. ca. 1931- ca. 1987
2. 1926-1956
3. Nazarene Weekly (scattered issues), 1986-1989

Third Church of the Nazarene, 1951-1961

***NON-DENOMINATIONAL:***

Bellevue Community Church, 2006-2008

Christ Church, 2006-2011

Cornerstone Church, 2010

Cross Point Community Church, 2008

***PRESBYTERIAN:***

First Presbyterian – Downtown

1. History
2. History
3. Civil War (Hospital No. 8), 1863
4. World Wars I and II, 1918, 1944
5. Special Programs, 1919-2001
6. Catechisms, 1861
7. Membership Lists, 1814, 1975
8. Separation (1st Pres. to Oak Hill; old church becomes Downtown ), 1944-1956
9. Separation, 1954
10. Dr. James I. Vance - Bulletins 1895, 1899
11. Dr. James I. Vance - Sermons, 1915-1918
12. Dr. James I. Vance - Sermons, 1920-1922
13. Dr. James I. Vance - Sermons, 1923
14. Dr. James I. Vance - Sermons, 1924-1927
15. Dr. James I. Vance - Sermons, 1928-1929
16. Dr. James I. Vance – Sermons and Bulletins, 1930-1940
17. Dr. James I. Vance - Sermons, undated
18. Rev. Thomas Calhoun Barr, c. 1934-1942
19. Dr. Walter Courtenay - Sermons and Bulletins, 1944
20. Dr. Walter Courtenay - Sermons and Bulletins, 1945
21. Dr. Walter Courtenay - Sermons and Bulletins, 1946

22. Dr. Walter Courtenay - Sermons and Bulletins, 1947-1950
23. Dr. Walter Courtenay - Sermons and Bulletins, 1953-1956
24. Dr. Walter Courtenay - Sermons and Bulletins, undated
25. Misc. Bulletins and Sermons, 1929-2000
26. Misc. (unidentified speech), ca. 1943

First Presbyterian [Oak Hill], 1955-2001

Glen Leven, 1972-1975

Hillsboro, 1927-ca.1975

Madison, 1971-1987

Second Presbyterian, 1903-1992

West Nashville, various dates

Westminster, 1938-1945

Woodland (Street), 1911, n.d.

***UNITARIAN, UNIVERSALIST, & UNITY (noted "UUU" on folders):***

Unitarian/Universalist, 2007

Unity, 2007

***UNITED CHURCH OF CHRIST:***

First United Church of Christ, 1989, 1992
